# Supplementary material for: Effect of Previous Crops and Soil Physicochemical Properties on the Population of Verticillium dahliae in the Iberian Peninsula
Source: MDPI journal article supplement (doi:10.3390/jof8100988), 2022-09-21
Supplement: s1 [file s1]

**Supplementary Table S1.** Attributes of fields sampled for *Verticillium dahliae* microsclerotia in the Iberian Peninsula.

| City                 | District   | Coutry   | Field                     | Field number | Latit.  | Longit. | Soil texture    | Previous cropping history | Ms/g soil |
|----------------------|------------|----------|---------------------------|--------------|---------|---------|-----------------|---------------------------|-----------|
| Alcolea del Río      | Cordoba    | Spain    | Jose Ramirez (Cerca Casa) | 1            | -4.6719 | 37.9327 | Clay            | Barely favourable         | 0         |
| Alcolea del Río      | Cordoba    | Spain    | Jose Ramirez (Pendiente)  | 2            | -4.6719 | 37.9327 | Clay loam       | Barely favourable         | 0         |
| Avis                 | Portalegre | Portugal | Neto Valente (Avis)       | 3            | -7.8912 | 39.0569 | Sandy clay loam | Barely favourable         | 0.8       |
| Belalcázar           | Cordoba    | Spain    | Francisco Ollero          | 4            | -5.1561 | 38.5776 | Loam            | Barely favourable         | 0         |
| Elvas                | Portalegre | Portugal | Francisco Borba           | 5            | -7.1636 | 38.8801 | Loam            | Barely favourable         | 0.4       |
| Elvas                | Portalegre | Portugal | Courela do lobo (Elvas)   | 6            | -7.1636 | 38.8801 | Clay loam       | Barely favourable         | 0         |
| Elvas                | Portalegre | Portugal | Boavista(Elvas)           | 7            | -7.1636 | 38.8801 | Clay loam       | Barely favourable         | 0         |
| Ferreira do Alentejo | Beja       | Portugal | Jordi Salvado (Carretera) | 8            | -8.1037 | 38.0578 | Sandy clay loam | Barely favourable         | 0         |
| Ferreira do Alentejo | Beja       | Portugal | Jordi Salvado(Balsa)      | 9            | -8.1037 | 38.0578 | Sandy clay loam | Barely favourable         | 0         |
| Ferreira do Alentejo | Beja       | Portugal | Jordi Salvado M1          | 10           | -8.1037 | 38.0578 | Sandy clay loam | Barely favourable         | 0         |
| Ferreira do Alentejo | Beja       | Portugal | Jordi Salvado M2          | 11           | -8.1037 | 38.0578 | Sandy clay loam | Barely favourable         | 0         |
| Ferreira do Alentejo | Beja       | Portugal | Jordi Salvado M3          | 12           | -8.1037 | 38.0578 | Sandy clay loam | Barely favourable         | 0         |
| Ferreira do Alentejo | Beja       | Portugal | Jordi Salvado M4          | 13           | -8.1037 | 38.0578 | Sandy loam      | Barely favourable         | 0         |
| Ferreira do Alentejo | Beja       | Portugal | Jordi Salvado M5          | 14           | -8.1037 | 38.0578 | Sandy clay loam | Barely favourable         | 0         |

(Continued)

Supplementary Table S1. Continued.

| City                 | District   | Coutry   | Field                                                | Field number | Latit.  | Longit. | Soil texture    | Previous cropping history | Ms/g soil |
|----------------------|------------|----------|------------------------------------------------------|--------------|---------|---------|-----------------|---------------------------|-----------|
| Ferreira do Alentejo | Beja       | Portugal | Jordi Salvado M6                                     | 15           | -8.1037 | 38.0578 | Sandy loam      | Barely favourable         | 0         |
| Ferreira do Alentejo | Beja       | Portugal | Ferreira do Alentejo(Savo) Camino del pino izquierda | 16           | -8.1037 | 38.0578 | Sandy clay loam | Barely favourable         | 0         |
| La Carlota           | Cordoba    | Spain    | Federico Garcia M1                                   | 17           | -4.9338 | 37.6726 | Sandy loam      | Barely favourable         | 0         |
| Macossa              | Lisbon     | Portugal | Casa Agricola Antunes Barroso M1                     | 18           | -8.8638 | 39.1954 | Clay loam       | Barely favourable         | 0.4       |
| Macossa              | Lisbon     | Portugal | Casa Agricola Antunes Barroso M2                     | 19           | -8.8638 | 39.1954 | Loam            | Barely favourable         | 0         |
| Macossa              | Lisbon     | Portugal | Casa Agricola Antunes Barroso M3                     | 20           | -8.8638 | 39.1954 | Clay loam       | Barely favourable         | 0         |
| Macossa              | Lisbon     | Portugal | Casal das Sarnadas S.A.                              | 21           | -8.8638 | 39.1954 | Sandy loam      | Barely favourable         | 0         |
| Medina del Campo     | Valladolid | Spain    | Miguel Angel Buitrago (Parcela Grande)               | 22           | -4.915  | 41.3084 | Sandy clay loam | Barely favourable         | 0         |
| Montoro              | Cordoba    | Spain    | El Cerote (Jose Fernando Aguilar)                    | 23           | -4.3835 | 38.0227 | Clay            | Barely favourable         | 0         |
| Olivenza             | Badajoz    | Spain    | Valondo (Delantera)                                  | 24           | -7.1026 | 38.6826 | Sandy clay loam | Barely favourable         | 0         |
| Olivenza             | Badajoz    | Spain    | El Cedeño (Franca)                                   | 25           | -7.1026 | 38.6826 | Sandy clay loam | Barely favourable         | 0         |
| Olivenza             | Badajoz    | Spain    | Valondo (Trasera)                                    | 26           | -7.1026 | 38.6826 | Sandy loam      | Barely favourable         | 0         |
| Palma del Río        | Cordoba    | Spain    | Antonio Valle (Suelo negro)                          | 27           | -5.2802 | 37.6982 | Clay            | Barely favourable         | 2.4       |
| Palma del Río        | Cordoba    | Spain    | Antonio Valle (Suelo chinarro)                       | 28           | -5.2802 | 37.6982 | Clay            | Barely favourable         | 1.2       |
| Portillo             | Valladolid | Spain    | Victor Fernandez 1                                   | 29           | -4.5728 | 41.4806 | Sandy           | Barely favourable         | 0         |
| Portillo             | Valladolid | Spain    | Victor Fernandez 2                                   | 30           | -4.5728 | 41.4806 | Sandy           | Barely favourable         | 0         |
| Santaella            | Cordoba    | Spain    | Federico Garcia M2                                   | 31           | -4.843  | 37.5622 | Clay            | Barely favourable         | 1.2       |
| Santaella            | Cordoba    | Spain    | Federico Garcia M4                                   | 32           | -4.843  | 37.5622 | Clay            | Barely favourable         | 0         |

(Continued)

Supplementary Table S1. Continued.

| City                    | District    | Coutry | Field                                 | Field number | Latit.  | Longit. | Soil texture    | Previous cropping history | Ms/g soil |
|-------------------------|-------------|--------|---------------------------------------|--------------|---------|---------|-----------------|---------------------------|-----------|
| Tocina                  | Seville     | Spain  | Jose Antonio Espinar (Parcela Grande) | 33           | -5.7339 | 37.61   | Sandy clay loam | Barely favourable         | 2         |
| Torrecedera             | Cadiz       | Spain  | Luis Romero                           | 34           | -5.943  | 36.6091 | Clay            | Barely favourable         | 0         |
| Utrera                  | Sevilla     | Spain  | Antonio Valle                         | 35           | -5.7792 | 37.1849 | Clay            | Barely favourable         | 0         |
| Utrera                  | Sevilla     | Spain  | Lorenzo Calderon 1                    | 36           | -5.7792 | 37.1849 | Sandy loam      | Barely favourable         | 0         |
| Utrera                  | Sevilla     | Spain  | Lorenzo Calderon 2                    | 37           | -5.7792 | 37.1849 | Sandy           | Barely favourable         | 0         |
| Valdepeñas              | Ciudad real | Spain  | La Abundancia                         | 38           | -4.475  | 40.8361 | Sandy clay loam | Barely favourable         | 0.31      |
| Andújar                 | Jaen        | Spain  | Pedro Burgos M2 (Propio)              | 39           | -4.0287 | 38.2055 | Clay            | favourable                | 0.4       |
| El Carpio               | Cordoba     | Spain  | Bartolome Carmona                     | 40           | -4.4968 | 37.941  | Clay            | favourable                | 0.4       |
| Avileses                | Murcia      | Spain  | J.M Guillamon (La Peraleja 2)         | 41           | -0.9433 | 37.8495 | Clay loam       | favourable                | 6         |
| Ecija                   | Sevilla     | Spain  | Pepe Ramirez 2 (Cortijo)              | 42           | -5.0827 | 37.5415 | Clay            | favourable                | 12        |
| Jerez de la Frontera    | Cadiz       | Spain  | Juan Carlos Bernal                    | 43           | -6.1259 | 36.6853 | Clay loam       | favourable                | 0.4       |
| Jerez de la Frontera    | Cadiz       | Spain  | Jerez maiz M2                         | 44           | -6.1259 | 36.6853 | Clay            | favourable                | 10.8      |
| Jerez de la Frontera    | Cadiz       | Spain  | Jerez trigo M3                        | 45           | -6.1259 | 36.6853 | Clay            | favourable                | 8.8       |
| Jerez de la Frontera    | Cadiz       | Spain  | Jerez trigo M4                        | 46           | -6.1259 | 36.6853 | Clay loam       | favourable                | 0         |
| Jerez de la Frontera    | Cadiz       | Spain  | Jerez girasol M1                      | 47           | -6.1259 | 36.6853 | Clay            | favourable                | 1.2       |
| Las Cabezas de San Juan | Seville     | Spain  | Enrique Gonzalez de la peña           | 48           | -5.9382 | 36.9804 | Sandy clay loam | favourable                | 0         |
| Las Cabezas de San Juan | Sevilla     | Spain  | Antonio Valle 1 a 11                  | 49           | -5.9382 | 36.9804 | Clay            | favourable                | 0.4       |
| Los Palacios            | Seville     | Spain  | Juan Ramon Martinez M2                | 50           | -5.9277 | 37.1631 | Sandy clay loam | favourable                | 0         |

(Continued)

Supplementary Table S1. Continued.

| City                    | District | Coutry | Field                             | Field number | Latit.  | Longit. | Soil texture    | Previous cropping history | Ms/g soil |
|-------------------------|----------|--------|-----------------------------------|--------------|---------|---------|-----------------|---------------------------|-----------|
| Santaella               | Cordoba  | Spain  | Finca Santa Margarita             | 51           | -4.843  | 37.5622 | Clay            | favourable                | 0.4       |
| Villarubia              | Córdoba  | Spain  | Gerardo Amian (Algodón)           | 52           | -4.9176 | 37.8484 | Clay loam       | favourable                | 0.8       |
| Andújar                 | Jaen     | Spain  | Pedro Burgos M1 (Antiguo)         | 53           | -4.0287 | 38.2055 | Clay            | very favourable           | 44.4      |
| Ecija                   | Sevilla  | Spain  | Sotillo Gallego 1 (camino)        | 54           | -5.0827 | 37.5415 | Clay            | very favourable           | 7.6       |
| Ecija                   | Sevilla  | Spain  | Pepe Ramirez 3 (Cerca rio)        | 55           | -5.0827 | 37.5415 | Clay            | very favourable           | 33.6      |
| Ecija                   | Sevilla  | Spain  | Pepe Ramirez 1 (Cerca carretera)  | 56           | -5.0827 | 37.5415 | Clay            | very favourable           | 12.4      |
| Écija                   | Sevilla  | Spain  | Sotillo Gallego 2 (Transformador) | 57           | -5.0827 | 37.5415 | Clay            | very favourable           | 19.2      |
| La Carlota              | Cordoba  | Spain  | Federico Garcia M2                | 58           | -4.9338 | 37.6726 | Sandy clay loam | very favourable           | 4.8       |
| Las Cabezas de San Juan | Seville  | Spain  | Enrique Gonzalez de la peña       | 59           | -5.9382 | 36.9804 | Clay            | very favourable           | 20.4      |
| Los Palacios            | Seville  | Spain  | Juan Ramon Martinez M3            | 60           | -5.9277 | 37.1631 | Sandy loam      | very favourable           | 0         |
| Santaella               | Cordoba  | Spain  | Federico Garcia M3                | 61           | -4.843  | 37.5622 | Clay            | very favourable           | 1.6       |
| Seville                 | Seville  | Spain  | La Corchuela 13                   | 62           | -5.9209 | 37.2829 | Sandy loam      | very favourable           | 0         |
| Seville                 | Seville  | Spain  | La Corchuela 10                   | 63           | -5.9209 | 37.2829 | Sandy loam      | very favourable           | 0.8       |
| Seville                 | Seville  | Spain  | La Corchuela 21                   | 64           | -5.9209 | 37.2829 | Loam            | very favourable           | 4         |
| Almodovar               | Cordoba  | Spain  | Galan (Pendiente)                 | 65           | -5.0146 | 37.8132 | Clay loam       | extremely favourable      | 8.4       |
| Almodovar               | Cordoba  | Spain  | Galan (gasolinera)                | 66           | -5.0146 | 37.8132 | Sandy clay loam | extremely favourable      | 46.6      |
| Arjonilla               | Jaen     | Spain  | Juan Carlos Roldan Zona 3         | 67           | -4.1066 | 37.9745 | Clay            | extremely favourable      | 52        |
| El Carpio               | Cordoba  | Spain  | Santiago Estevez Palomar          | 68           | -4.4968 | 37.941  | Clay            | extremely favourable      | 1.2       |
| Espelúy                 | Jaen     | Spain  | Ecotex 1                          | 69           | -3.8623 | 38.0323 | Loam            | extremely favourable      | 12.26     |

(Continued)

**Supplementary Table S1.** Continued.

| City                    | District | Coutry | Field                  | Field number | Latit.  | Longit. | Soil texture    | Previous cropping history | Ms/g soil |
|-------------------------|----------|--------|------------------------|--------------|---------|---------|-----------------|---------------------------|-----------|
| La Lantejuela           | Sevilla  | Spain  | Rafael Calle           | 70           | -5.2228 | 37.3544 | Clay            | extremely favourable      | 2.8       |
| Las Cabezas de San Juan | Seville  | Spain  | Juan Bastos            | 71           | -5.9382 | 36.9804 | Sandy clay loam | extremely favourable      | 0         |
| Seville                 | Seville  | Spain  | La Corchuela 6         | 72           | -5.9209 | 37.2829 | Clay loam       | extremely favourable      | 1.2       |
| Seville                 | Seville  | Spain  | La Corchuela 4         | 73           | -5.9209 | 37.2829 | Sandy clay loam | extremely favourable      | 10.4      |
| Vejer de la Frontera    | Cadiz    | Spain  | Finca Las Lomas P-42-4 | 74           | -5.9667 | 36.252  | Sandy clay loam | extremely favourable      | 0         |
| Vejer de la Frontera    | Cadiz    | Spain  | Finca Las Lomas P-42-2 | 75           | -5.9667 | 36.252  | Sandy clay loam | extremely favourable      | 0.4       |
| Vejer de la Frontera    | Cadiz    | Spain  | Finca Las Lomas P-42-3 | 76           | -5.9667 | 36.252  | Sandy clay loam | extremely favourable      | 0.8       |
| Vejer de la Frontera    | Cadiz    | Spain  | Finca Las Lomas P-42-5 | 77           | -5.9667 | 36.252  | Sandy clay loam | extremely favourable      | 0         |
| Vejer de la Frontera    | Cadiz    | Spain  | Finca Las Lomas P-42-1 | 78           | -5.9667 | 36.252  | Sandy clay loam | extremely favourable      | 0         |
| Vejer de la Frontera    | Cadiz    | Spain  | Finca Las Lomas P-50-1 | 79           | -5.9667 | 36.252  | Sandy clay loam | extremely favourable      | 6.8       |
| Vejer de la Frontera    | Cadiz    | Spain  | Finca Las Lomas P-50-2 | 80           | -5.9667 | 36.252  | Sandy clay loam | extremely favourable      | 24.4      |
| Vejer de la Frontera    | Cadiz    | Spain  | Finca Las Lomas P-50-3 | 81           | -5.9667 | 36.252  | Sandy loam      | extremely favourable      | 10.4      |
| Vejer de la Frontera    | Cadiz    | Spain  | Finca Las Lomas P-50-4 | 82           | -5.9667 | 36.252  | Sandy clay loam | extremely favourable      | 15.6      |

(Continued)

**Supplementary Table S1.** Continued.

| City                 | District | Coutry | Field                  | Field number | Latit.  | Longit. | Soil texture       | Previous cropping history | Ms/g soil |
|----------------------|----------|--------|------------------------|--------------|---------|---------|--------------------|---------------------------|-----------|
| Vejer de la Frontera | Cadiz    | Spain  | Finca Las Lomas P-50-5 | 83           | -5.9667 | 36.252  | Sandy clay<br>loam | extremely favourable      | 18.8      |
| Villa del Río        | Cordoba  | Spain  | Hnos. Caro             | 84           | -4.2935 | 37.9814 | Clay               | extremely favourable      | 8.4       |

<sup>1</sup> long rotation had < 2 host crops to *V. dahliae* in five years; an intermediate rotation had host crops to *V. dahliae* 51-71% of the time; a none rotation indicated that all crops were susceptible to *V. dahliae*; a short rotation indicated that one crop in five years was not a host of *V. dahliae*.
